# Supplementary material for: Electrochemically induced surface modifications of mesoporous spinels (Co3O4−δ, MnCo2O4−δ, NiCo2O4−δ) as the origin of the OER activity and stability in alkaline medium
Source: Royal Society of Chemistry journal article supplement (doi:10.1039/c5ta04437e), 2015-01-01
Supplement: c5ta04437e1.pdf [file c5ta04437e1.pdf]

## Supporting information

### **Electrochemically induced surface modifications of mesoporous spinels ( $\text{Co}_3\text{O}_{4-\delta}$ , $\text{MnCo}_2\text{O}_{4-\delta}$ , $\text{NiCo}_2\text{O}_{4-\delta}$ ) as the origin of the OER activity and stability in alkaline medium**

I. Abidat <sup>1,2</sup>, N. Bouchenafa-Saib <sup>2</sup>, A. Habrioux <sup>\*,1</sup>, C. Comminges <sup>\*,1</sup>, C. Canaff <sup>1</sup>, J. Rousseau <sup>1</sup>, T.W. Napporn <sup>1</sup>, D. Dambournet <sup>3,4</sup>, O. Borkiewicz <sup>5</sup>, B. Kokoh <sup>1</sup>.

Author information : aurelien.habrioux@univ-poitiers.fr; clement.comminges@univ-poitiers.fr

1. Université de Poitiers, IC2MP CNRS UMR 7285, 4 rue Michel Brunet B27, TSA51106, 86073 Poitiers, Cedex 9, France

2. Laboratoire d'Analyse fonctionnelle des procédés chimiques, Faculté de Technologie, Université Blida 1, BP 270 Route de Soumâa Blida, Algeria.

3 Sorbonne Universités, UPMC Univ Paris 06, UMR 8234, PHENIX, F-75005, Paris, France.

4 CNRS, UMR 8234, PHENIX, F-75005, Paris, France.

5 X-ray Science Division, Advanced Photon Source, Argonne National Laboratory, Argonne, Illinois 60439, United States.

#### **Synthesis of mesoporous NiO**

0.50 g of SBA-15 were dispersed in 5 mL of ethanol containing nickel nitrate  $\text{Ni}(\text{NO}_3)_2 \cdot 6\text{H}_2\text{O}$  (99%, Merck) at a concentration of  $0.7 \text{ mol L}^{-1}$ . The solution was then stirred for 1 h at room temperature before evaporation of ethanol at  $50 \text{ }^\circ\text{C}$ . The composite was calcined at  $300 \text{ }^\circ\text{C}$  for 6 h in order to decompose nitrate species. A second impregnation was carried under the same experimental conditions. The impregnation step was followed by calcination at  $450 \text{ }^\circ\text{C}$  for 6 h under air. The silica template was then removed using  $2 \text{ mol L}^{-1}$  NaOH aqueous solution. Mesoporous NiO powder was then filtered and washed several times with ultra-pure water. The powder was finally dried at  $50 \text{ }^\circ\text{C}$  during 24 h.

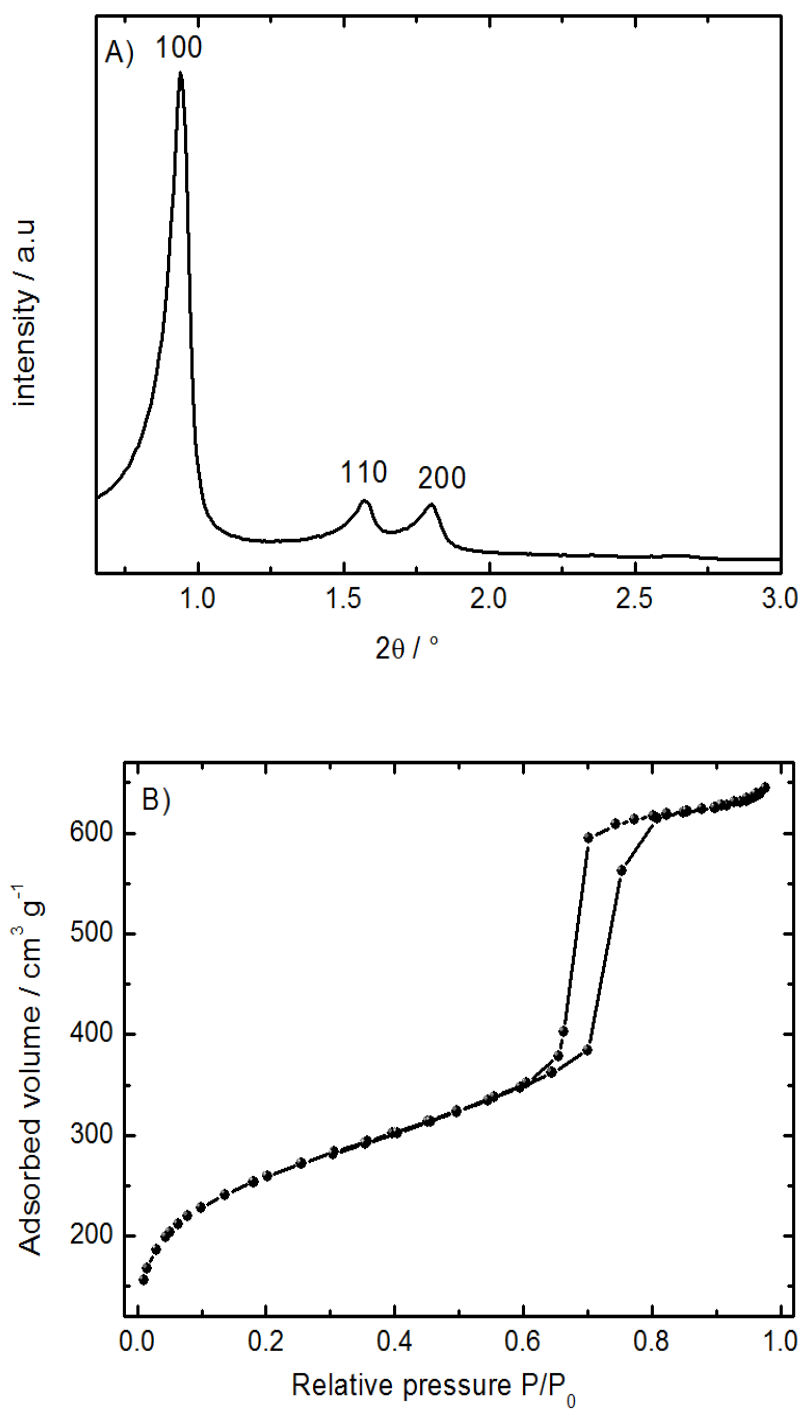

**Figure S1.** (A) Low angle XRD pattern of SBA-15 template; (B) N<sub>2</sub> adsorption-desorption isotherm for SAB-15 template.

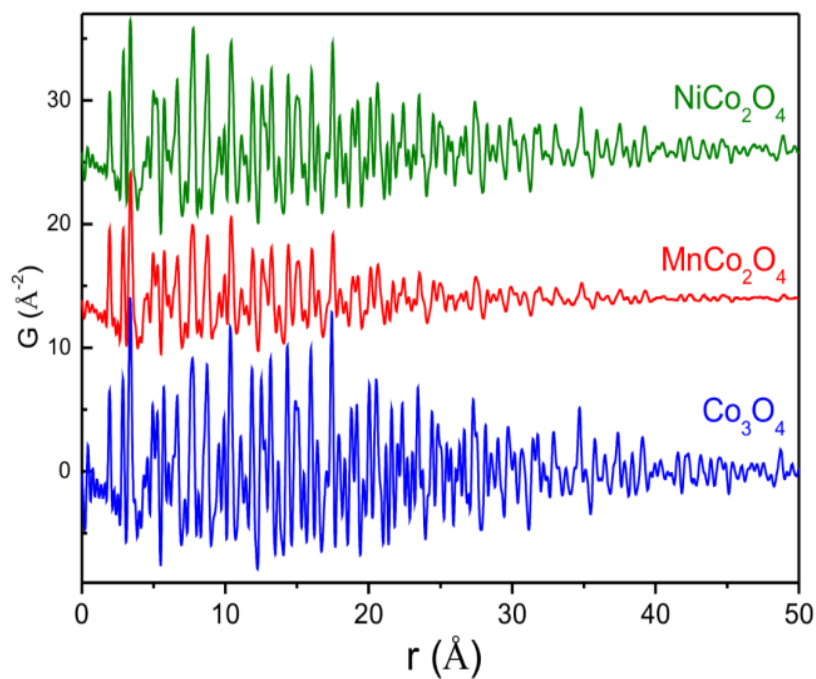

**Figure S2.** PDFs of  $\text{Co}_3\text{O}_{4-\delta}$ ,  $\text{MnCo}_2\text{O}_{4-\delta}$ ,  $\text{NiCo}_2\text{O}_{4-\delta}$ . In the case of  $\text{MnCo}_2\text{O}_{4-\delta}$ , the features in the PDF tend to fall off at around 40 Å which primary indicates a lower particle size as compared to  $\text{Co}_3\text{O}_{4-\delta}$  and  $\text{NiCo}_2\text{O}_{4-\delta}$ .

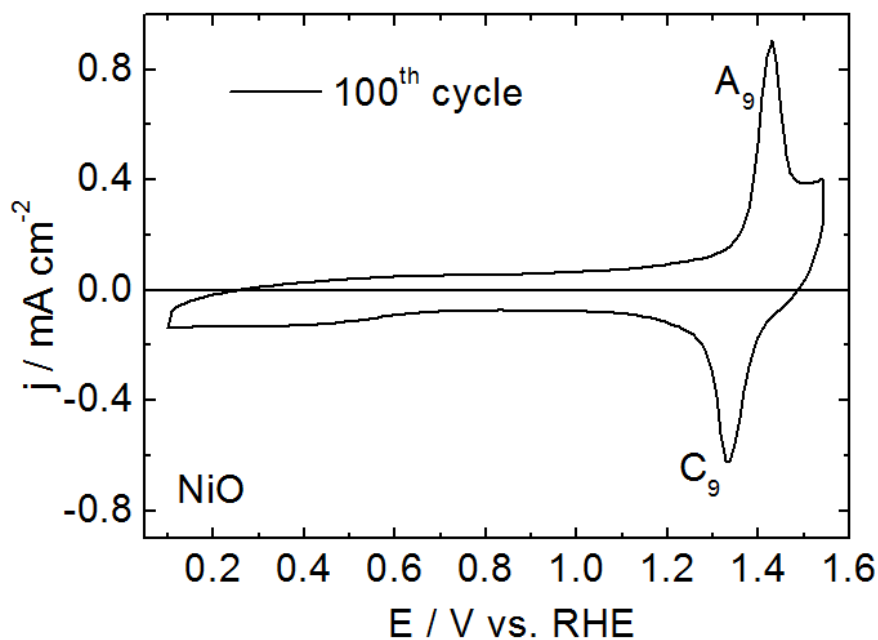

**Figure S3.** Voltammogram recorded in supporting electrolyte (0.1 M KOH) under  $\text{N}_2$  atmosphere at a scan rate of  $50 \text{ mV s}^{-1}$  with NiO at room temperature

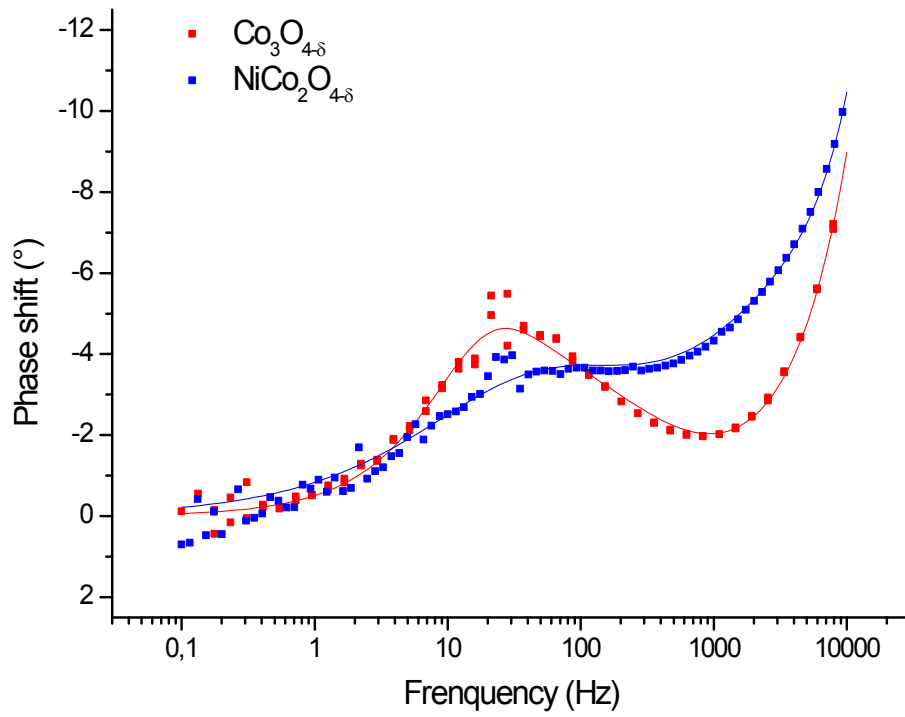

**Figure S4.** Overlay of EIS bode plots for  $\text{Co}_3\text{O}_{4-\delta}$  (red) and  $\text{NiCo}_2\text{O}_{4-\delta}$  (blue) at 1.800 V vs. RHE. Solid lines are fitting results.
